# Supplementary material
Source: Research Square preprint supplement (doi:10.21203/rs.3.rs-9117504/v1)
Supplement: Supplementary file 1 [file 6ce2b59a17eb143bd8ab227c.pdf]

**Appendix A**  
**AI-Generated Pragmatic Outputs Across 40 Scenarios**

| Scenario | Speech Act     | Pragmatic Features    | Politeness / Hedging          | Arabic Cultural Grounding | Context  |
|----------|----------------|-----------------------|-------------------------------|---------------------------|----------|
| 1        | Request        | Modal verb request    | <i>Could, I was wondering</i> | Relational politeness     | Peer     |
| 2        | Request        | Formal request        | <i>Would it be possible</i>   | Respect for authority     | Academic |
| 3        | Request        | Peer assistance       | <i>Could you help me</i>      | Solidarity emphasis       | Peer     |
| 4        | Refusal        | Soft refusal          | <i>I'm afraid, apology</i>    | Social harmony            | Social   |
| 5        | Refusal        | Academic refusal      | Apology + explanation         | Group obligation          | Academic |
| 6        | Apology        | Acknowledgment        | <i>I sincerely apologize</i>  | Respect & hierarchy       | Academic |
| 7        | Apology        | Error correction      | Apology + clarification       | Face-saving               | Academic |
| 8        | Apology        | Interruption          | Softening phrase              | Deference                 | Mixed    |
| 9        | Suggestion     | Idea proposal         | <i>Perhaps, maybe</i>         | Indirect advice           | Academic |
| 10       | Suggestion     | Improvement advice    | Hedging                       | Non-imposition            | Academic |
| 11       | Advice         | Study strategy        | Polite recommendation         | Indirect guidance         | Peer     |
| 12       | Complaint      | Service issue         | <i>I'm afraid, please</i>     | Avoid confrontation       | Social   |
| 13       | Complaint      | Noise complaint       | Indirect mitigation           | Harmony                   | Social   |
| 14       | Complaint      | Formal complaint      | Polite framing                | Respect                   | Formal   |
| 15       | Gratitude      | Appreciation          | Explicit thanks               | Relational gratitude      | Peer     |
| 16       | Gratitude      | Formal thanks         | Elevated register             | Respect                   | Academic |
| 17       | Gratitude      | Personal thanks       | Warm tone                     | Solidarity                | Peer     |
| 18       | Clarification  | Instruction request   | <i>Could you please</i>       | Deference                 | Academic |
| 19       | Clarification  | Procedure inquiry     | <i>Would you mind</i>         | Politeness                | Peer     |
| 20       | Small talk     | Greeting              | Informal                      | Social bonding            | Peer     |
| 21       | Greeting       | Formal greeting       | Title use                     | Honorific norms           | Academic |
| 22       | Disagreement   | Mitigated stance      | <i>I see your point, but</i>  | Indirect disagreement     | Academic |
| 23       | Correction     | Soft correction       | <i>Maybe, I think</i>         | Face-saving               | Peer     |
| 24       | Opinion        | Academic stance       | Hedged opinion                | Authority awareness       | Academic |
| 25       | Invitation     | Study group           | Polite invitation             | Relational framing        | Peer     |
| 26       | Invitation     | Formal invite         | Honorific tone                | Respect                   | Academic |
| 27       | Permission     | Request               | <i>May I</i>                  | Authority respect         | Academic |
| 28       | Request        | Recommendation letter | Formal hedging                | Deference                 | Academic |
| 29       | Request        | Technical help        | Polite request                | Non-imposition            | Peer     |
| 30       | Apology        | Misunderstanding      | Explanation                   | Relationship repair       | Academic |
| 31       | Sympathy       | Emotional support     | Empathy phrases               | Relational care           | Social   |
| 32       | Congratulation | Achievement           | Positive politeness           | Collective pride          | Peer     |
| 33       | Clarification  | Group work            | Polite inquiry                | Deference                 | Peer     |

| <b>Scenario</b> | <b>Speech Act</b> | <b>Pragmatic Features</b> | <b>Politeness / Hedging</b> | <b>Arabic Cultural Grounding</b> | <b>Context</b> |
|-----------------|-------------------|---------------------------|-----------------------------|----------------------------------|----------------|
| 34              | Suggestion        | Group decision            | <i>Perhaps we could</i>     | Indirect leadership              | Academic       |
| 35              | Small talk        | Weekend talk              | Casual                      | Family orientation               | Peer           |
| 36              | Apology           | Interruption              | Softening                   | Deference                        | Peer           |
| 37              | Compliment        | Performance praise        | Positive politeness         | Modesty norms                    | Academic       |
| 38              | Offer             | Help offering             | Polite offer                | Relational support               | Peer           |
| 39              | Clarification     | Feedback inquiry          | Respectful hedging          | Authority awareness              | Academic       |
| 40              | Gratitude         | Personal thanks           | Warm tone                   | Solidarity                       | Peer           |
